# Supplementary material
Source: Springer Nature journal article supplement (https://www.springermedizin.de/resource/supplementary/12889_2006_1021_MOESM9_ESM.pdf/9503152)
Supplement: MOESM9 [file 9503152]

**Week 25**

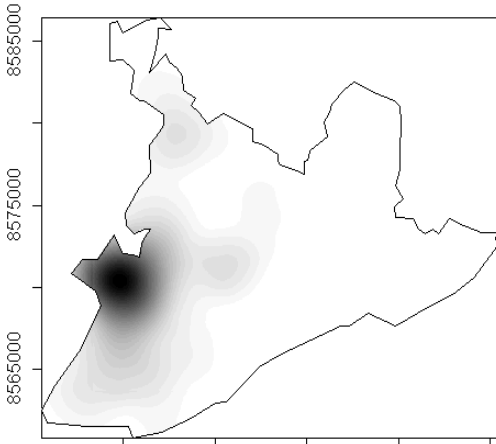

numbers of cases: 345

**Week 26**

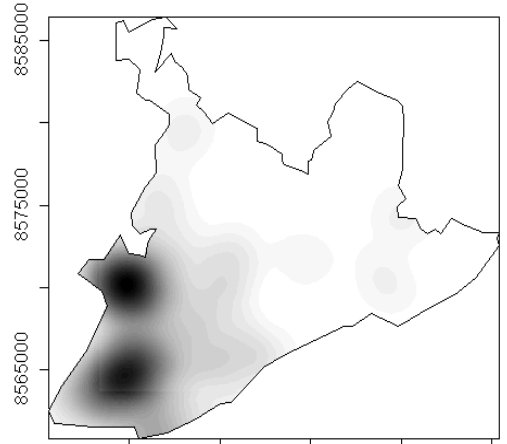

numbers of cases: 259

**Week 27**

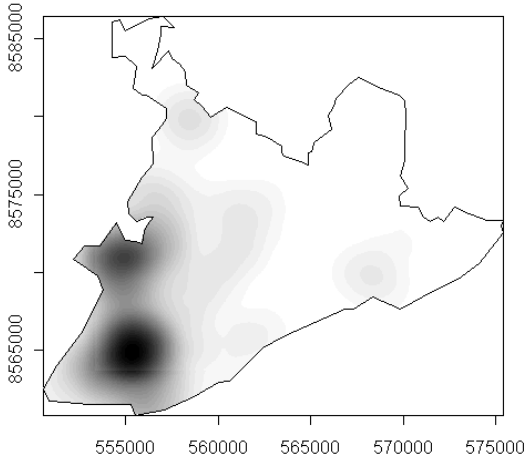

numbers of cases: 206

**Week 28**

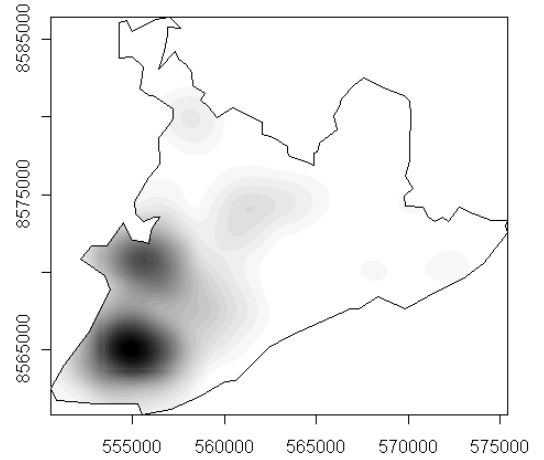

numbers of cases: 227

**Week 29**

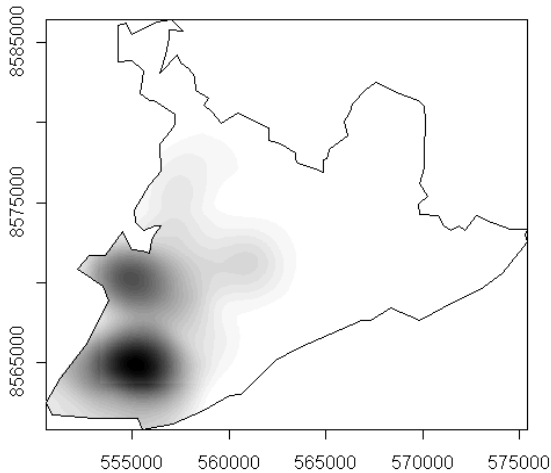

numbers of cases: 151

**Week 30**

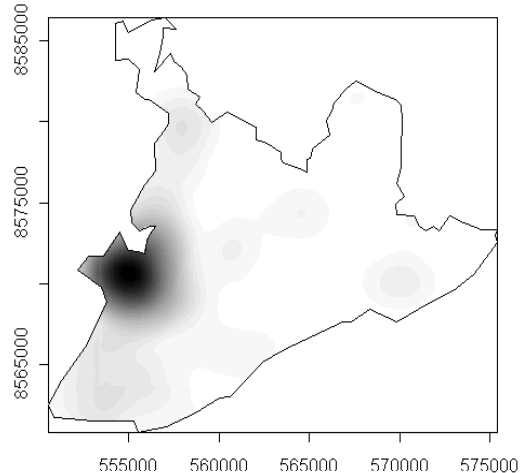

numbers of cases: 107
